# Supplementary material for: Role of gallium and yttrium dopants on the stability and performance of solution processed indium oxide thin-film transistors
Source: Royal Society of Chemistry journal article supplement (doi:10.1039/c8tc06270f), 2019-01-01
Supplement: c8tc06270f1.pdf [file c8tc06270f1.pdf]

## Supporting Information

### **Role of gallium and yttrium dopants on the stability and performance of solution processed indium oxide thin-film transistors**

*Felix Jaehnike,<sup>†,‡</sup> Duy Vu Pham,<sup>†</sup> Claudia Bock<sup>§</sup> and Ulrich Kunze<sup>‡</sup>*

<sup>†</sup>Evonik Industries AG, 45772 Marl, Germany.

<sup>‡</sup> Werkstoffe und Nanoelektronik, Ruhr-Universität Bochum, 44801 Bochum, Germany.

<sup>§</sup> Mikrosystemtechnik, Ruhr-Universität Bochum, 44801 Bochum, Germany

#### **Corresponding Author**

E-Mail: [claudia.bock@rub.de](mailto:claudia.bock@rub.de)

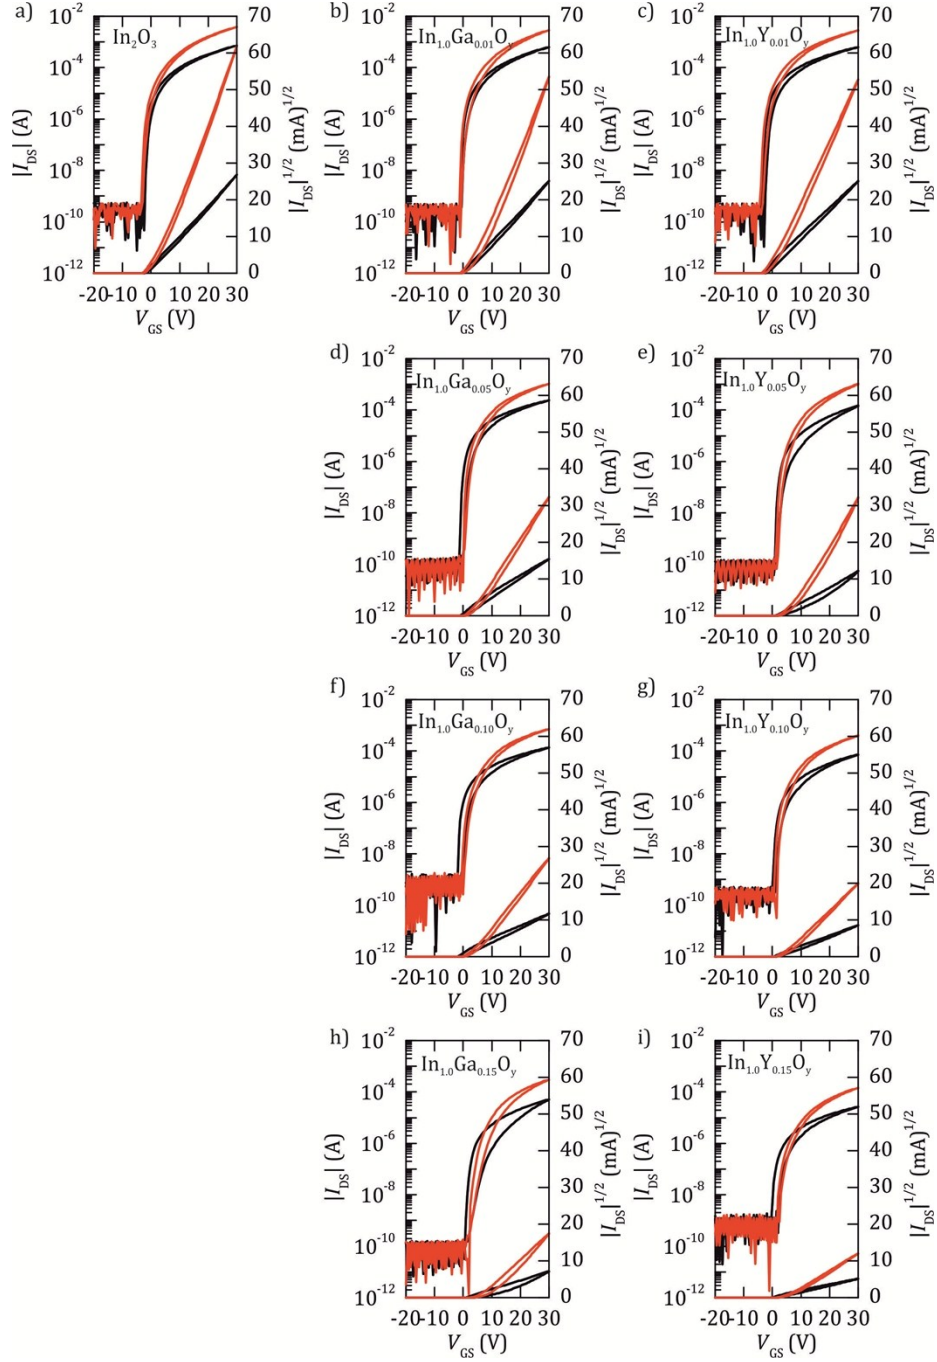

Fig. S 1: Transfer characteristics of TFTs with different metal-oxides as semiconductor material:  $\text{In}_2\text{O}_3$  (first column),  $\text{InGaO}$  (second column) and  $\text{InYO}$  (third column) in the proportions b, c) 100:1, d, e) 100:5, f, g) 100:10 and h, i) 100:15. Black curves:  $V_{\text{DS}} = 2 \text{ V}$ , red curves:  $V_{\text{DS}} = 10 \text{ V}$ .

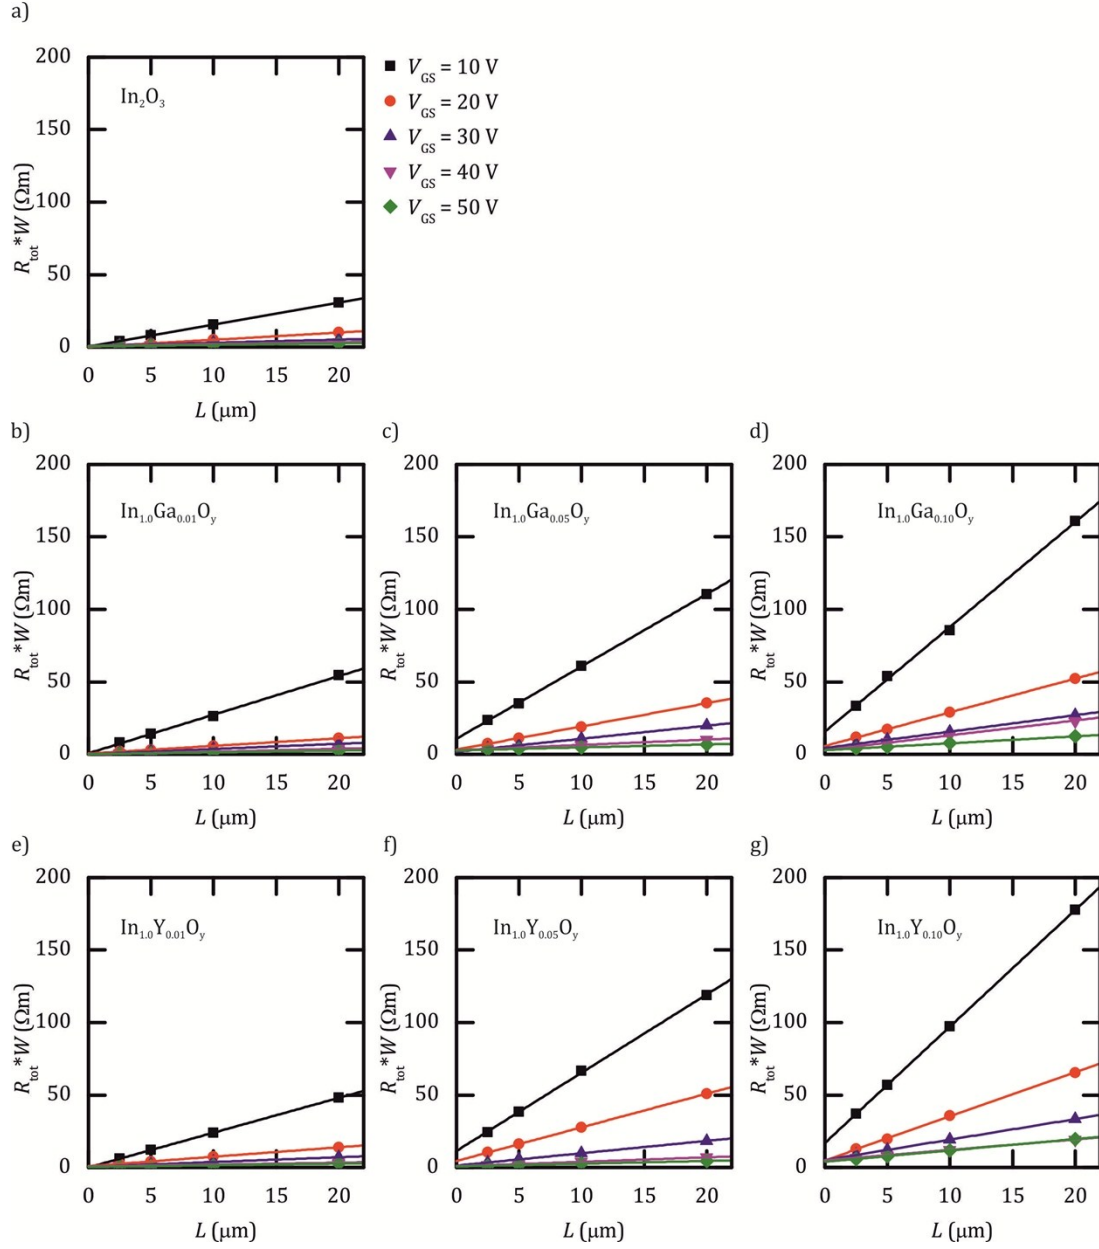

Fig. S2: Width-normalized device resistance  $R_{\text{tot}} * W$  as a function of channel length  $L$  ( $10\text{ V} \leq V_{\text{GS}} \leq 50\text{ V}$ ) for transistors with (a) undoped  $\text{In}_2\text{O}_3$ , (b-d)  $\text{In}_{1.0}\text{Ga}_x\text{O}_y$  with  $x = 0.01; 0.05; 0.1$  and (e-g)  $\text{In}_{1.0}\text{Y}_x\text{O}_y$  with  $x = 0.01; 0.05; 0.1$ .

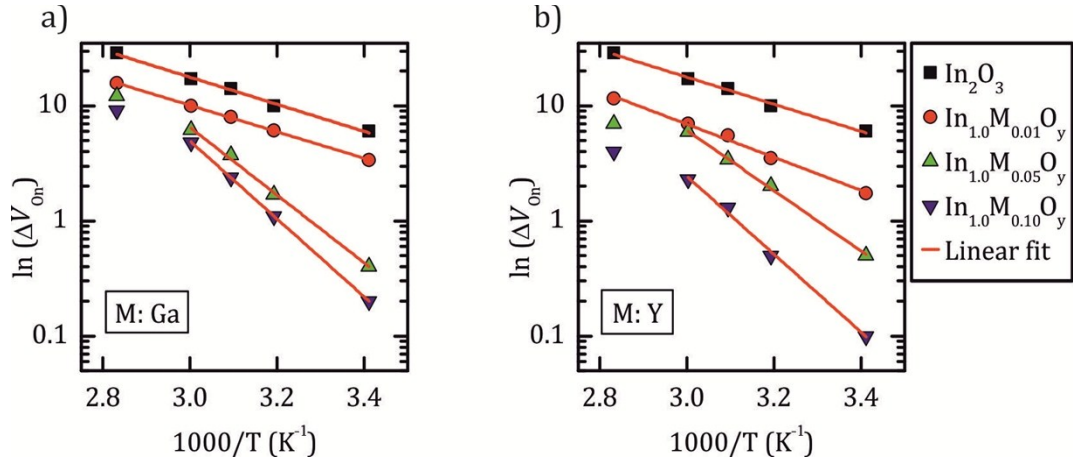

Fig. S 3: Semi-logarithmic scale of the onset voltage shift  $\Delta V_{on}$  during temperature stress versus the reciprocal temperature of TFTs with different metal oxide compositions: a) indium oxide and  $In_{1.0}Ga_xO_y$  and b) Indium oxide und  $In_{1.0}Y_xO_y$  with  $x = 0.01, 0.05, 0.10$ . The red curves are the linear fits of the data points.
